# Supplementary material for: Predicting the Trajectory of Replacements of SARS-CoV-2 Variants Using Relative Reproduction Numbers
Source: MDPI journal article supplement (doi:10.3390/v14112556), 2022-11-18
Supplement: s1 [file s1]

# Predicting the Trajectory of Replacements of SARS-CoV-2 Variants Using Relative Reproduction Numbers

Chayada Piantham <sup>1</sup> and Kimihito Ito <sup>2,\*</sup>

<sup>1</sup> Graduate School of Infectious Diseases, Hokkaido University

<sup>2</sup> International Institute for Zoonosis Control, Hokkaido University

\* Correspondence: itok@czc.hokudai.ac.jp

## Supplementary Materials

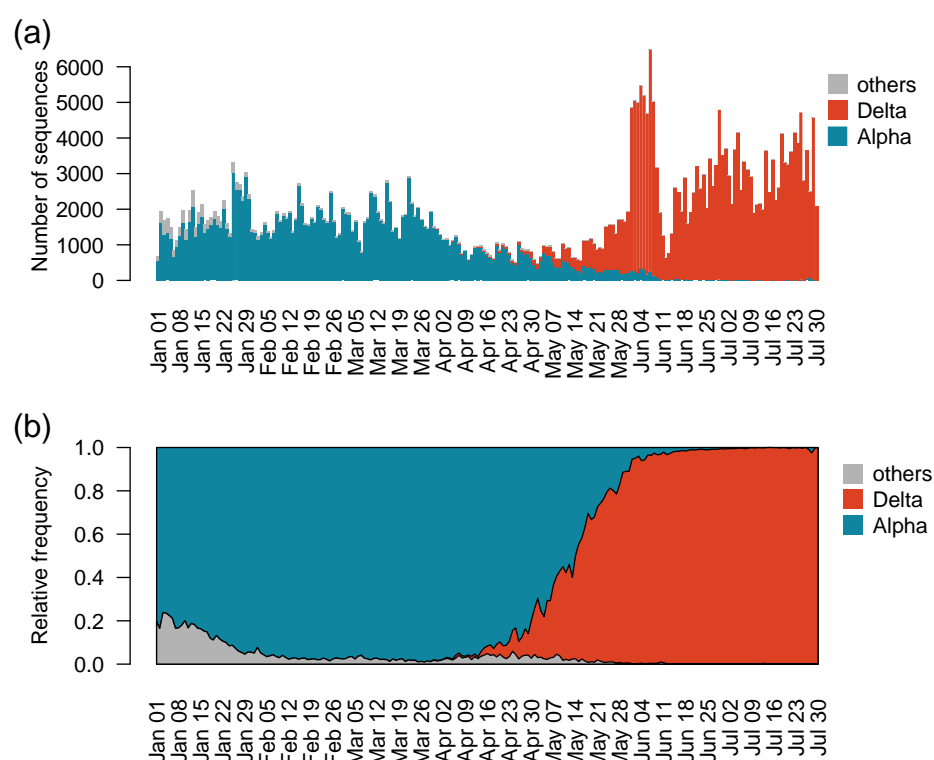

**Figure S1.** Daily variant frequencies of Alpha (red), Delta (blue), and other variants (gray) in England during 1st January 2021 to 31st July 2021 calculated from nucleotide sequences on the GISAID database.

**Table S1.** Metadata of nucleotide sequences of SARS-CoV-2 viruses collected from England during 1st January 2021 to 31st July 2021. (please see the excel file)

**Table S2.** Parameters estimated from entire observation by the binomial distribution model and comparison of AIC values with that of the beta-binomial distribution model.

| Model                      | $k$ (95% CI)      | $q_Y(t_Y)$ (95% CI)     | $M$ (95% CI)            | Log likelihood | AIC <sup>†</sup> |
|----------------------------|-------------------|-------------------------|-------------------------|----------------|------------------|
| Beta-binomial distribution | 1.88 (1.85, 1.91) | 0.0005 (0.0004, 0.0006) | 288.54 (202.96, 406.26) | −431.00        | 868.00           |
| Binomial distribution      | 1.92 (1.91, 1.93) | 0.0003 (0.0003, 0.0004) | –                       | −643.06        | 1292.12          |

<sup>†</sup>AIC refers to the Akaike information criterion of the model.

**Table S3.** Comparison between AIC values of the renewal-equation-based model and that of the logistic regression model estimated from entire observation.

| Model                  | $k$ (95% CI)      | $q_Y(t_Y)$ (95% CI)     | Intercept (95% CI) | $M$ (95% CI)            | Log likelihood | AIC    |
|------------------------|-------------------|-------------------------|--------------------|-------------------------|----------------|--------|
| Renewal-equation-based | 1.88 (1.85, 1.91) | 0.0005 (0.0004, 0.0006) | –                  | 288.54 (202.96, 406.26) | −431.00        | 868.00 |
| Logistic regression    | 1.93 (1.92, 1.97) | –                       | 0.12 (0.12, 0.13)  | 235.67 (186.14, 393.88) | −435.24        | 876.48 |
